# Supplementary material
Source: PubMed Central journal article supplement (PMC7768916)
Supplement: Schnipper_Appendix_1_Figure_1_Stepped_Wedge_Figure.pdf [file Schnipper_Appendix_1_Figure_1_Stepped_Wedge_Figure.pdf]

| Step                        |            | Nov '13         | Dec '13 | Jan '14        | Feb '14                     | Mar '14        | Apr '14                                    | May '14                   | Jun '14                    | Jul '14 | Aug '14                      | Sep '14 | Oct '14 | Nov '14                                  | Dec '14 | Jan '15 | Feb '15 | Mar '15 | Apr '15 | May '15 | Jun '15 | Jul '15 | Aug '15 | Sep '15 | Oct '15 |  |  |
|-----------------------------|------------|-----------------|---------|----------------|-----------------------------|----------------|--------------------------------------------|---------------------------|----------------------------|---------|------------------------------|---------|---------|------------------------------------------|---------|---------|---------|---------|---------|---------|---------|---------|---------|---------|---------|--|--|
| <b>Hospital A Practices</b> |            |                 |         |                |                             |                |                                            |                           |                            |         |                              |         |         |                                          |         |         |         |         |         |         |         |         |         |         |         |  |  |
| 1                           | Practice A | 11/6/2013 N=64  |         |                | 4/5/2014 N=183              |                |                                            |                           |                            |         |                              |         |         |                                          |         |         |         |         |         |         |         |         |         |         |         |  |  |
| 2                           | Practice B | 11/13/2013 N=19 |         |                |                             | 5/13/2014 N=47 |                                            |                           |                            |         |                              |         |         |                                          |         |         |         |         |         |         |         |         |         |         |         |  |  |
| 2                           | Practice C | 11/13/2013 N=12 |         |                |                             | 5/13/2014 N=37 |                                            |                           |                            |         |                              |         |         |                                          |         |         |         |         |         |         |         |         |         |         |         |  |  |
| 3                           | Practice D | 11/6/2013 N=41  |         |                |                             |                | 6/6/2014 (6/16/2014) N=53                  |                           |                            |         |                              |         |         |                                          |         |         |         |         |         |         |         |         |         |         |         |  |  |
| 4                           | Practice E |                 |         |                | 2/4/2014 N=21               |                |                                            | 7/4/2014 (7/25/2014) N=34 |                            |         |                              |         |         |                                          |         |         |         |         |         |         |         |         |         |         |         |  |  |
| 5                           | Practice F |                 |         |                | 2/11/2014 N=41              |                |                                            |                           | 8/11/2014 (8/25/2014) N=73 |         |                              |         |         |                                          |         |         |         |         |         |         |         |         |         |         |         |  |  |
| 6                           | Practice G | 11/6/2013 N=36  |         |                | 9/6/2014 (10/14/2014) N=15  |                |                                            |                           |                            |         |                              |         |         |                                          |         |         |         |         |         |         |         |         |         |         |         |  |  |
| 7                           | Practice H | 11/6/2013 N=89  |         |                | 10/6/2014 (10/14/2014) N=74 |                |                                            |                           |                            |         |                              |         |         |                                          |         |         |         |         |         |         |         |         |         |         |         |  |  |
| <b>Hospital B Practices</b> |            |                 |         |                |                             |                |                                            |                           |                            |         |                              |         |         |                                          |         |         |         |         |         |         |         |         |         |         |         |  |  |
| 1                           | Practice I |                 |         |                | 2/7/2014 N=49               |                |                                            | 7/7/2014 (7/23/2014) N=97 |                            |         |                              |         |         |                                          |         |         |         |         |         |         |         |         |         |         |         |  |  |
| 2                           | Practice J |                 |         |                | 2/7/2014 N=28               |                |                                            |                           | 8/7/2014 (9/29/2014) N=65  |         |                              |         |         |                                          |         |         |         |         |         |         |         |         |         |         |         |  |  |
| 3                           | Practice K |                 |         | 1/23/2014 N=33 |                             |                | 9/23/2014 (10/14/2014 and 2/17/2015)* N=50 |                           |                            |         |                              |         |         |                                          |         |         |         |         |         |         |         |         |         |         |         |  |  |
| 4                           | Practice L |                 |         |                |                             |                |                                            | 5/21/2014 N=16            |                            |         | 10/18/2014 (12/15/2014) N=35 |         |         |                                          |         |         |         |         |         |         |         |         |         |         |         |  |  |
| 5                           | Practice M |                 |         |                |                             |                |                                            | 5/21/2014 N=36            |                            |         | 11/21/2014 (1/12/2015) N=42  |         |         |                                          |         |         |         |         |         |         |         |         |         |         |         |  |  |
| 6                           | Practice N |                 |         |                |                             |                |                                            |                           |                            |         | 7/7/2014 N=25                |         |         | 1/7/2015 (2/17/2015 and 3/23/2015)* N=53 |         |         |         |         |         |         |         |         |         |         |         |  |  |
| 7                           | Practice O |                 |         |                | 2/7/2014 N=65               |                |                                            | 2/7/2015 (3/30/2015) N=26 |                            |         |                              |         |         |                                          |         |         |         |         |         |         |         |         |         |         |         |  |  |
| 8                           | Practice P |                 |         |                |                             |                |                                            |                           |                            |         | 7/7/2014 N=32                |         |         | 3/7/2015 (3/23/2015) N=39                |         |         |         |         |         |         |         |         |         |         |         |  |  |
| <b>Other ACO Practices</b>  |            |                 |         |                |                             |                |                                            |                           |                            |         |                              |         |         |                                          |         |         |         |         |         |         |         |         |         |         |         |  |  |
| 1                           | Practice Q | 12/2/2013 N=72  |         |                | 11/2/2014 (11/18/2014) N=55 |                |                                            |                           |                            |         |                              |         |         |                                          |         |         |         |         |         |         |         |         |         |         |         |  |  |

|            |               |              |
|------------|---------------|--------------|
| Usual Care | Delayed Start | Intervention |
|------------|---------------|--------------|
