# Supplementary material
Source: PubMed Central journal article supplement (PMC7768916)
Supplement: Schnipper_Appendix_1_Tables_1-4_and_Figure_1_Caption.pdf [file Schnipper_Appendix_1_Tables_1-4_and_Figure_1_Caption.pdf]

## Appendix 1. Supplementary Data Tables

**Appendix 1 Table 1. Intervention Components, Modifications, and Implementation Challenges**

| Component                              | Original Design                                                                                                                                                          | Modifications and Challenges                                                                                                                                                                                                     |
|----------------------------------------|--------------------------------------------------------------------------------------------------------------------------------------------------------------------------|----------------------------------------------------------------------------------------------------------------------------------------------------------------------------------------------------------------------------------|
| Inpatient Medication Safety            | Inpatient pharmacist counseling to ensure accurate medication reconciliation, patient/caregiver education, communication with providers                                  | Not deployed on all units due to staffing constraints; Difficulties identifying patients in need of discharge counseling in time to provide it (i.e., before discharge)                                                          |
| Inpatient Discharge Advocate (DA)      | Nurse who communicates with outpatient team to ensure a safe discharge plan and prepares patients for discharge                                                          | Hospital 1: one NP played role, high degree of quality control, but not enough availability to see all patients;<br><br>Hospital 2: Attending Nurses played role, but restricted to communication with ROC, less quality control |
| Responsible Outpatient Clinician (ROC) | Provider (e.g., nurse) from patient's primary care practice to communicate with DA, conduct video conference, post-discharge call, and post-discharge visit with patient | Variability due to licensure/scope of practice of ROC (RN, LPN, PA); Competition for time with other tasks                                                                                                                       |
| Communication between ROC and DA       | Exchange of information regarding previous challenges to post-discharge management, anticipation of needs for current post-hospitalization course                        | Inconsistently implemented until research team added a project manager to facilitate communication; Challenges with different communication styles between inpatient and outpatient providers                                    |

|                              |                                                                                                                                                                                               |                                                                                                                                                     |
|------------------------------|-----------------------------------------------------------------------------------------------------------------------------------------------------------------------------------------------|-----------------------------------------------------------------------------------------------------------------------------------------------------|
| Inpatient Video Conference   | ROC conference with patient while in the hospital to provide encouragement and logistical support for post-discharge visit                                                                    | Not implemented due to logistical challenges of finding a time when ROC, patient, and DA all available                                              |
| Post-discharge Phone Call    | ROC call to patient within 2 days of discharge to screen for new or worsening symptoms and problems carrying out post-discharge care plan                                                     | Used templates to standardize content, with some success; Inconsistently implemented in surgical patients                                           |
| Post-discharge Clinic Visit  | Multi-disciplinary primary care visit to assess progress along plan of care, ensure patient safety, and optimize post-discharge outcomes                                                      | Often PCP alone, used templates, but content rarely standardized in practice; Some practices booked post-discharge patients with another physician. |
| Visiting Nurse Appointments* | Network home care nurse to visit patient soon after discharge and assess ability of patient to carry out post-discharge care plan, identify key caregivers, and communicate concerns with PCP | Variability among front-line visiting nurses; Some did not see enough patients to develop proficiency in intervention                               |
| Home Pharmacist Visits*      | Home visit by pharmacist to identify and resolve medication discrepancies, screen for drug-related problems, provide management plan, and communicate findings                                | Referral rates and patient acceptance of program lower than expected                                                                                |
| CHF Telemedicine Program*    | Daily monitoring and transmission of weights, with diuretic dose adjustment by a nurse specialist                                                                                             | Low enrollment rates due to eligibility criteria, competing programs                                                                                |
| Advance Care Planning*       | Identify patients at high risk of short-term mortality, provide palliative care                                                                                                               | Modified eligibility criteria from an existing risk algorithm to                                                                                    |

|                                                |                                                                                                                                      |                                                                                                                                                            |
|------------------------------------------------|--------------------------------------------------------------------------------------------------------------------------------------|------------------------------------------------------------------------------------------------------------------------------------------------------------|
|                                                | consultation, and communicate with providers as appropriate                                                                          | soliciting input from inpatient attendings and PCPs;<br>Enrollment rates were low                                                                          |
| Integrated Care Management Program*            | Existing nurse-run program which provides intensive outreach and support through primary care office for selected high-risk patients | Modified post-discharge elements of the intervention in participating patients to avoid redundancy with this program                                       |
| Partners' Enterprise Patient List application  | System to document in real-time all members of the patient's care team and facilitate email communication                            | Documentation of team members limited by workflow and cultural issues; email capability used sporadically                                                  |
| Automated Admission Notification               | Secure, electronic notification sent to PCP when a patient is admitted to an ACO-affiliated hospital                                 | In many practices, the nurse care manager also monitored these messages on a daily basis to know who was admitted and discharged from affiliated hospitals |
| Web-based Discharge Ordering Module            | Ensure quality of discharge documentation by auto-importing information and requiring completion of structured data fields           | No modifications                                                                                                                                           |
| Tests Pending at Discharge Notification System | Automated notification of inpatient attending and PCP of tests pending at discharge after results finalized                          | Implemented in Hospital A only                                                                                                                             |

\* Optional programs for selected patients

**Appendix 1 Table 2. Rates of Adverse Events By Type**

| <b>Adverse Event Type</b>   | <b>Usual Care (Rate per 100 patients)</b> | <b>Intervention (Rate per 100 patients)</b> | <b>IRR (95% CI)</b> | <b>P value</b> |
|-----------------------------|-------------------------------------------|---------------------------------------------|---------------------|----------------|
| Adverse Drug Event          | 12.1                                      | 8.0                                         | 0.66 (0.48-0.90)    | <b>0.009</b>   |
| Hospital Acquired Infection | 0.6                                       | 0.3                                         | 0.52 (0.12-2.33)    | 0.39           |
| Procedural Complication     | 3.2                                       | 0.9                                         | 0.28 (0.13-0.62)    | <b>0.002</b>   |
| Surgical Complication       | 2.4                                       | 4.1                                         | 1.74 (0.97-3.10)    | 0.06           |
| Diagnostic Error            | 0.3                                       | 0.2                                         | 0.69 (0.10-4.94)    | 0.72           |
| Management Error            | 4.3                                       | 3.7                                         | 0.86 (0.53-1.41)    | 0.55           |

**Appendix 1 Table 3. Subgroup Analyses for Post-Discharge Adverse Events**

|                                         | <b>Int vs Usual Care<br/>Adjusted Incidence<br/>Rate Ratio (95%CI)**</b> | <b>p-value for effect of<br/>intervention</b> | <b>p-value for interaction<br/>term (subgroup*arm)</b> |
|-----------------------------------------|--------------------------------------------------------------------------|-----------------------------------------------|--------------------------------------------------------|
| <b>Service</b>                          |                                                                          |                                               |                                                        |
| Medicine                                | 0.60 (0.37, 0.99)                                                        | <b>0.046</b>                                  | 0.80                                                   |
| Surgery                                 | 0.60 (0.35, 0.91)                                                        | <b>0.02</b>                                   |                                                        |
| <b>Study Hospital</b>                   |                                                                          |                                               |                                                        |
| BWH                                     | 0.69 (0.47, 1.02)                                                        | 0.06                                          | >0.99                                                  |
| MGH                                     | 0.69 (0.43, 1.09)                                                        | 0.11                                          |                                                        |
| <b>Age</b>                              |                                                                          |                                               |                                                        |
| 65 and over                             | 0.57 (0.34, 0.96)                                                        | <b>0.03</b>                                   | 0.95                                                   |
| Below 65                                | 0.58 (0.37, 0.92)                                                        | <b>0.02</b>                                   |                                                        |
|                                         |                                                                          |                                               |                                                        |
| <b>Hospital score</b>                   |                                                                          |                                               |                                                        |
| 5 or more                               | 0.72 (0.38, 1.38)                                                        | 0.32                                          | 0.34                                                   |
| Below 5                                 | 0.54 (0.35, 0.85)                                                        | <b>0.007</b>                                  |                                                        |
|                                         |                                                                          |                                               |                                                        |
| <b>s-TOFHLA Literacy<br/>Score</b>      |                                                                          |                                               |                                                        |
| Adequate                                | 0.71 (0.31, 1.63)                                                        | 0.42                                          | 0.56                                                   |
| Inadequate to<br>marginal               | 0.62 (0.39, 0.97)                                                        | <b>0.04</b>                                   |                                                        |
| N/A                                     | 0.48 (0.27, 0.85)                                                        | <b>0.01</b>                                   |                                                        |
|                                         |                                                                          |                                               |                                                        |
| <b>Elixhauser Comorbidity<br/>Score</b> |                                                                          |                                               |                                                        |
| 5 or more                               | 0.52 (0.32, 0.84)                                                        | <b>0.01</b>                                   | 0.35                                                   |
| Below 5                                 | 0.64 (0.39, 1.03)                                                        | 0.07                                          |                                                        |

\*\*Adjusted for arm, HOSPITAL readmission risk score, Elixhauser comorbidity score, ED visits in the previous 6 months, study month, season, SF-12 score; primary care practice and inpatient unit as random effects. **IRR: incidence rate ratio**

**Appendix 1 Table 4. Examples of adverse events in the control arm that could potentially been prevented by the intervention**

| Clinical History                                                                                                                                                                                                                                                                                                                                                                                                                                | Category of Adverse Event                              | How it Might Have Been Prevented                                                                                                                                                                                |
|-------------------------------------------------------------------------------------------------------------------------------------------------------------------------------------------------------------------------------------------------------------------------------------------------------------------------------------------------------------------------------------------------------------------------------------------------|--------------------------------------------------------|-----------------------------------------------------------------------------------------------------------------------------------------------------------------------------------------------------------------|
| <p>Patient with history of recurrent kidney stones and urinary infections admitted for urinary infection, discharged on trimethoprim/sulfamethoxazole (for methicillin-resistant staph aureus) and amoxicillin/clavulanic acid (for enterococcus). Patient did not take the former antibiotic because thought she was supposed to take it after completing the course of the latter antibiotic. Readmitted for worsening urinary infection.</p> | <p>Adverse Drug Event due to patient non-adherence</p> | <p>Better education and counseling at discharge regarding discharge medication regimen; post-discharge phone call to confirm taking the correct medication regimen.</p>                                         |
| <p>Patient with bipolar disorder and hemophilia A admitted after mechanical fall and trauma to left knee, found to have hemarthrosis, treated with analgesics and physical therapy. Given crutches to use at discharge, but patient decided not to take them home. Seen in follow-up, noted to have increased pain, due in part to full weight-bearing. Given crutches at that appointment.</p>                                                 | <p>Management error</p>                                | <p>Better coaching at discharge regarding need for partial weight-bearing and use of crutches. Follow-up phone call to ensure receipt of durable medical equipment and ability to carry out discharge plan.</p> |
| <p>Patient with metastatic uterine sarcoma admitted for debulking surgery. Was not discharged on stool softeners, regular diet (“advance as tolerated”). Called her providers a few days after discharge with increased abdominal pain and bloating. Instructed to scale back to a clear liquid diet and take</p>                                                                                                                               | <p>Management error</p>                                | <p>Better coaching at discharge regarding what to expect after surgery, danger signs to watch for, need to slowly advance diet, use of a bowel regimen.</p>                                                     |

|                                                                                                                                                                                                                                                                                                                                                                                                      |                                                  |                                                                                                                                                                                                                |
|------------------------------------------------------------------------------------------------------------------------------------------------------------------------------------------------------------------------------------------------------------------------------------------------------------------------------------------------------------------------------------------------------|--------------------------------------------------|----------------------------------------------------------------------------------------------------------------------------------------------------------------------------------------------------------------|
| <p>laxatives, which relieved her symptoms.</p>                                                                                                                                                                                                                                                                                                                                                       |                                                  |                                                                                                                                                                                                                |
| <p>Patient admitted for a myocardial infarction, underwent cardiac catheterization with placement of a bare metal stent, discharged on several new medications, including high-dose atorvastatin. Patient informed at the pharmacy that medication required a prior authorization by his insurance, which was eventually obtained, but patient was without a statin for approximately 5 days.</p>    | <p>Management error</p>                          | <p>Pharmacist-assisted medication reconciliation at discharge to ensure all medications covered at discharge.</p>                                                                                              |
| <p>Patient admitted with chest pain, found to have acute renal failure due to ANCA-positive vasculitis, treated with steroids, cyclophosphamide, rituximab, and plasmapheresis. Discharged to continue plasmapheresis. A few days after discharge, patient developed fatigue and weakness, contacted providers, who felt it was likely due to poor oral intake in the setting of plasmapheresis.</p> | <p>Procedural complication</p>                   | <p>Better education and coaching prior to discharge regarding potential side effects of plasmapheresis, need for good oral intake.</p>                                                                         |
| <p>Patient with severe osteoarthritis admitted for elective total knee arthroplasty. Discharged with home health services. Developed cellulitis below the knee 1½ weeks after discharge, possibly from poor wound care at home.</p>                                                                                                                                                                  | <p>Surgical complication</p>                     | <p>Better coaching around self-management at discharge and after discharge regarding wound care.</p>                                                                                                           |
| <p>Patient with severe osteoarthritis admitted for total knee arthroplasty. Discharged on opioids and docusate, activity as tolerated. Developed constipation (no bowel movement for 5 days), noted</p>                                                                                                                                                                                              | <p>Adverse drug event; surgical complication</p> | <p>Counseling at discharge about possible constipation while on opioids and what to do if it occurs. Post-discharge call regarding development of any medication side effects. Counseling at discharge and</p> |

|                                                                                                                                                                                         |  |                                                                   |
|-----------------------------------------------------------------------------------------------------------------------------------------------------------------------------------------|--|-------------------------------------------------------------------|
| <p>during follow-up, treated with polyethylene glycol laxative. Also developed bleeding from wound, likely from excessive flexion of the knee, placed in an immobilizer for 1 week.</p> |  | <p>after discharge regarding avoiding excessive knee flexion.</p> |
|-----------------------------------------------------------------------------------------------------------------------------------------------------------------------------------------|--|-------------------------------------------------------------------|



## **Appendix 1, Figure Legend**

### **Appendix 1 Figure 1. Stepped Wedge Study Design**

Diagram illustrates when each primary care practice was assigned to Usual Care and was switched to the Intervention arm. If a practice started the Intervention late, the dates of the actual start are shown in parentheses. The region of delay is shaded by a darker blue. Also shown are the number of patients in each study arm of each practice.

\*For practices K and N, part of the practice started the intervention on one date, and part of the practice started the intervention at a later date.
